# Supplementary material
Source: publisher site journal article supplement (https://www.dovepress.com/article/296038)
Supplement: Supplementary file 1 [file get_supplementary_file.php]

Supplemental Table 1. Hallmark signaling pathways significantly enriched in high expression of MRPL13 group

| Hallmark Name | NES | NOM p-val | FDR q-val |
| --- | --- | --- | --- |
| MTORC1 signaling | 2.6185 | 0.0000 | 0.0000 |
| MYC targets V1 | 2.5195 | 0.0000 | 0.0000 |
| E2F targets | 2.5055 | 0.0000 | 0.0000 |
| Unfolded protein response | 2.4661 | 0.0000 | 0.0000 |
| G2/M checkpoint | 2.4341 | 0.0000 | 0.0000 |
| Oxidative phosphorylation | 2.3811 | 0.0000 | 0.0000 |
| DNA repair | 2.3797 | 0.0000 | 0.0000 |
| MYC targets V2 | 2.2657 | 0.0000 | 0.0002 |
| Glycolysis | 2.2529 | 0.0000 | 0.0002 |
| UV response up | 2.1696 | 0.0000 | 0.0008 |
| Spermatogenesis | 2.1378 | 0.0000 | 0.0010 |

Supplemental Table 2. KEGG signaling pathways significantly enriched in high expression of MRPL13 group

| KEGG NAME | NES | NOM p-val | FDR q-val |
| --- | --- | --- | --- |
| RNA degradation | 2.5089 | 0.0000 | 0.0000 |
| Oocyte meiosis | 2.4412 | 0.0000 | 0.0000 |
| Cell cycle | 2.4235 | 0.0000 | 0.0000 |
| Spliceosome | 2.4132 | 0.0000 | 0.0000 |
| Huntington’s disease | 2.3319 | 0.0000 | 0.0000 |
| Homologous recombination | 2.3317 | 0.0000 | 0.0000 |
| Pyrimidine metabolism | 2.3233 | 0.0000 | 0.0000 |
| Protein export | 2.3091 | 0.0000 | 0.0002 |
| Proteasome | 2.2830 | 0.0000 | 0.0002 |
| Basal transcription factors | 2.2827 | 0.0000 | 0.0002 |
| Oxidative phosphorylation | 2.2512 | 0.0000 | 0.0004 |
| Alzheimer’s disease | 2.2193 | 0.0000 | 0.0005 |
| Purine metabolism | 2.2046 | 0.0000 | 0.0005 |
| Parkinson’s disease | 2.1945 | 0.0000 | 0.0006 |
| Cysteine and methionine metabolism | 2.1388 | 0.0000 | 0.0013 |
| DNA replication | 2.1230 | 0.0000 | 0.0015 |
| RNA polymerase | 2.1229 | 0.0000 | 0.0014 |
| Progesterone mediated oocyte maturation | 2.1203 | 0.0000 | 0.0014 |
| Vibrio cholerae infection | 2.1122 | 0.0000 | 0.0015 |
| Ubiquitin mediated proteolysis | 2.0920 | 0.0000 | 0.0019 |
| Amino sugar and nucleotide sugar metabolism | 2.0796 | 0.0019 | 0.0021 |
| Mismatch repair | 2.1322 | 0.0019 | 0.0015 |
| Pentose phosphate pathway | 2.0184 | 0.0019 | 0.0040 |
| Citrate cycle TCA cycle | 2.0136 | 0.0019 | 0.0040 |
| Aminoacyl tRNA biosynthesis | 2.0446 | 0.0019 | 0.0032 |
